# Supplementary material for: A Ti4+-immobilized phosphate polymer-patterned silicon substrate for on-plate selective enrichment and self-desalting of phosphopeptides
Source: Royal Society of Chemistry journal article supplement (doi:10.1039/c5an00102a), 2015-01-01
Supplement: c5an00102a1.pdf [file c5an00102a1.pdf]

Electronic Supplementary Information

for

**Ti<sup>4+</sup>-immobilized Phosphate Polymer-patterned Silicon Substrate for  
On-plate Selective Enrichment and Self-desalting of Phosphopeptides**

Lei Xu,<sup>a</sup> Wei Zhu,<sup>c</sup> Rui Sun,<sup>a</sup> and Yin Ding\*<sup>a, b</sup>

*a. State Key Laboratory of Analytical Chemistry for Life Science, School of Chemistry and Chemical Engineering, Nanjing University, 22 Hankou Road, Nanjing 210093, China*

*b. Huaian High-Tech Research Institute of Nanjing University, Huaian 223005, PR China*

*c. Department of Oncology, First Affiliated Hospital of Nanjing Medical University, 300 Guangzhou Road, Nanjing 210029, PR China*

\* To whom correspondence should be addressed: Dr. Yin Ding, phone/fax 86-25-8368 6106,  
E-mail [dingyin@nju.edu.cn](mailto:dingyin@nju.edu.cn)

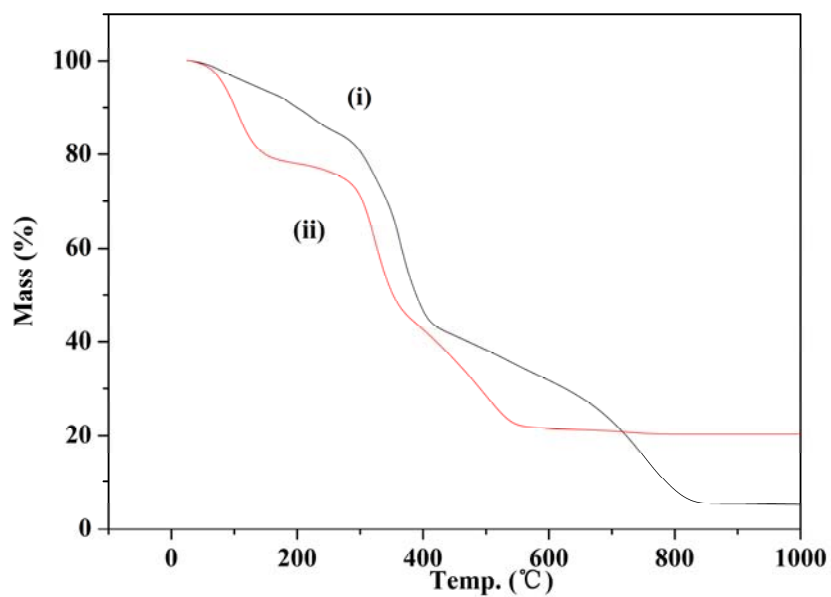

**Fig. S1.** TGA curves of: (i) poly(MAA-HEMAP); (ii) poly(MAA-HEMAP)-Ti<sup>4+</sup>.

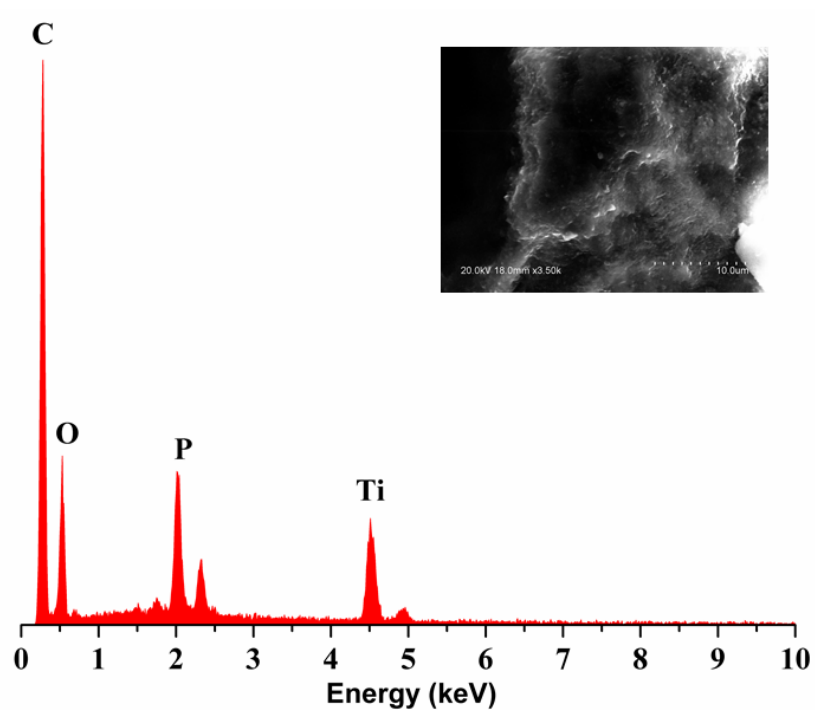

**Fig. S2.** The energy dispersive X-ray (EDX) spectrum data of poly(MAA-HEMAP)-Ti<sup>4+</sup>

**Table S1.** The energy dispersive X-ray (EDX) spectrum data of poly(MAA-HEMAP)-Ti<sup>4+</sup>

| Element | Wt%   | At%   |
|---------|-------|-------|
| C K     | 65.69 | 76.10 |
| O K     | 22.76 | 19.79 |
| P K     | 4.75  | 2.14  |
| Ti K    | 6.79  | 1.97  |

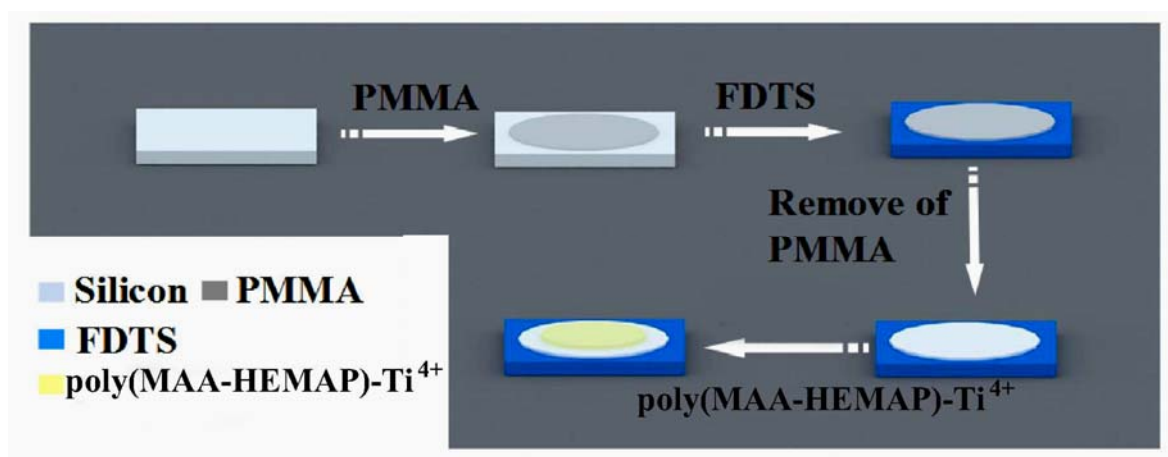

**Scheme S1.** Schematic illustration for the preparation of the patterned sample support.

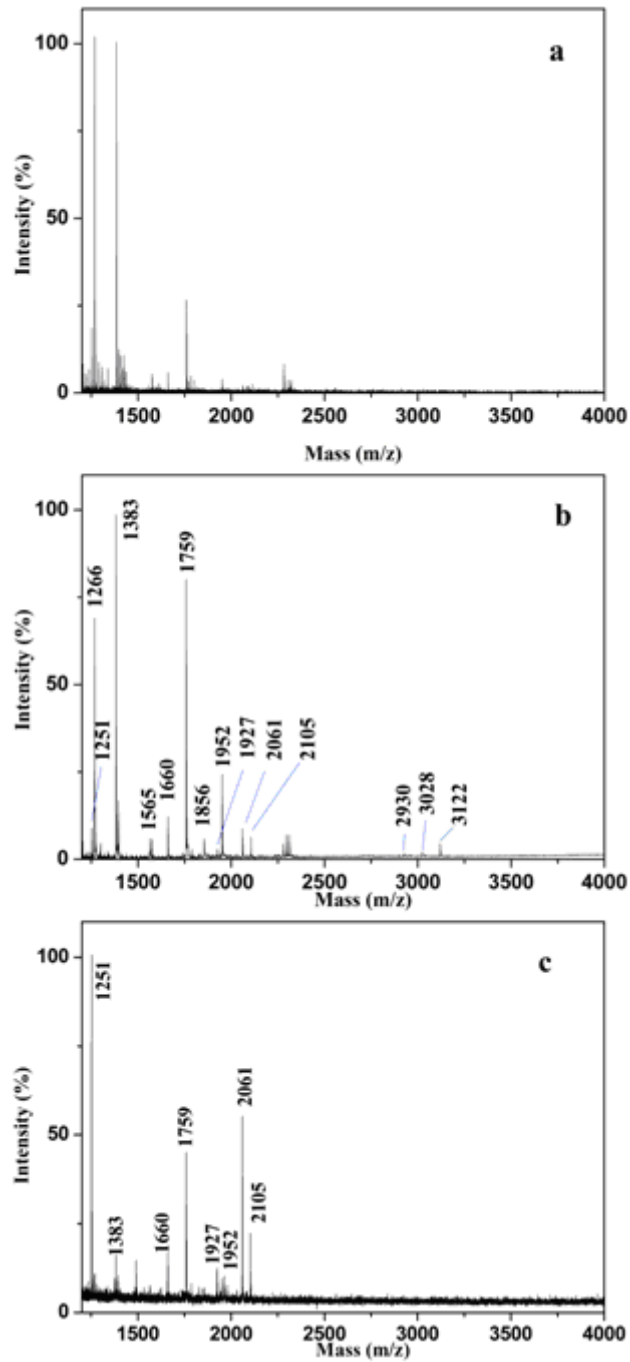

**Fig. S3.** Mass spectra of the peptides: casein ( $1.5 \times 10^3$  fmol  $\mu\text{L}^{-1}$ ) obtained with (a) the traditional MALDI plate and the patterned sample support: the concentration of casein are (b) 15 fmol  $\mu\text{L}^{-1}$ ; (c) 5 fmol  $\mu\text{L}^{-1}$ , respectively.

**Table S2.** Peptides detected in the sample by using the patterned sample support

| peak number | observed m/z | aa                    | amino acid sequence           | References   |
|-------------|--------------|-----------------------|-------------------------------|--------------|
| 1           | 1251         | $\alpha$ -S2(213–222) | TKVIPYVRYL                    | 1            |
| 2           | 1266         | $\alpha$ -S1(91–100)  | YLGYLEQLLR                    | 1, 2, 5      |
| 3           | 1337         | $\alpha$ -S1/52–73    | VNELpSKDIGpSEpSTEDQAMEDIK     | 1, 2, 4, 5   |
| 4           | 1383         | $\alpha$ -S1(38–49)   | FFVAPFPEVFGK                  | 1, 2, 5      |
| 5           | 1466         | $\alpha$ -S2(153–164) | TVDMESTEVFTK                  | 2, 4         |
| 6           | 1565         | beta-casein(1-25)     | RELEELNVPGEIVESLSSEESITR      | 3, 5         |
| 7           | 1637         | $\alpha$ -S1(106–118) | YLGYLEQLLRLLKK                | 1, 6         |
| 8           | 1641         | $\alpha$ -S1(38–51)   | FFVAPFPEVFGKEK                | 1            |
| 9           | 1660         | $\alpha$ -S1(121–134) | VPQLEIVPNSAEER                | 2, 4, 5, 6   |
| 10          | 1759         | $\alpha$ -S1(23–37)   | HQGLPQEVLNENLLR               | 1, 2, 5      |
| 11          | 1832         | $\alpha$ -S1(106-120) | YLGEYLIVPNSAEER               | 4, 6         |
| 12          | 1848         | $\alpha$ -S1(58–73)   | DIGpSETEDQAMEDIK              | 1, 2         |
| 13          | 1856         | $\alpha$ -S1(119-134) | DIGpSEpSTEDQAMEDIK            | 5            |
| 14          | 1927         | $\alpha$ -S1(43–58)   | DIGpSEpSTEDQAMEDIK            | 2, 4, 1      |
| 15          | 1952         | $\alpha$ -S1(119–134) | YKVPQLEIVPNSAEER              | 2, 3, 4, 5,6 |
| 16          | 2029         |                       | KEESEESDDDMGFGLFD             | 2            |
| 17          | 2061         | beta-casein (33–48)   | FQ-pS-EEQQQTEDELQDK           | 3, 6         |
| 18          | 2105         | $\alpha$ -S1(189–208) | TDAPSFSDIPNPIGSENSEK          | 1            |
| 19          | 2559         | beta-casein(33–52)    | FQSEEQQQTEDELQDKIHPF          | 3, 6         |
| 20          | 2736         | $\alpha$ -S1(74-94)   | Q-oxM-EAESISSSEIIVPNSVEQK     | 6            |
| 21          | 2930         | $\alpha$ -S1(49-74)   | KEKVNELpSKDIGpSEpSTEDQAMEDIKQ | 2, 4         |
| 22          | 3028         | beta-casein(/1-25)    | RELEELNVPGEIVESLSSEESITR      | 2, 3, 6      |
| 23          | 3122         | beta-casein(/1-25)    | RELEELNVPGEIVESLSSEESITR      | 2, 3, 6      |

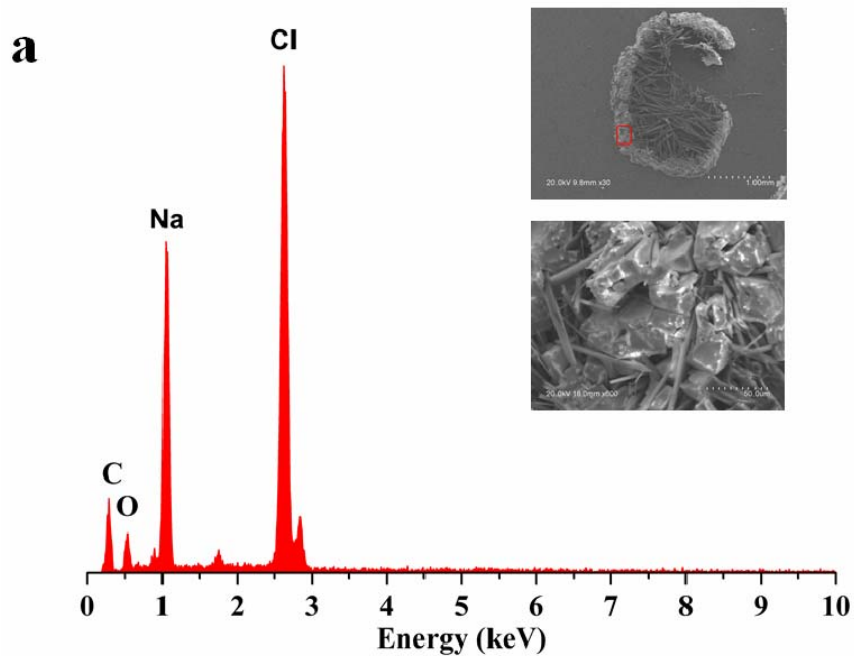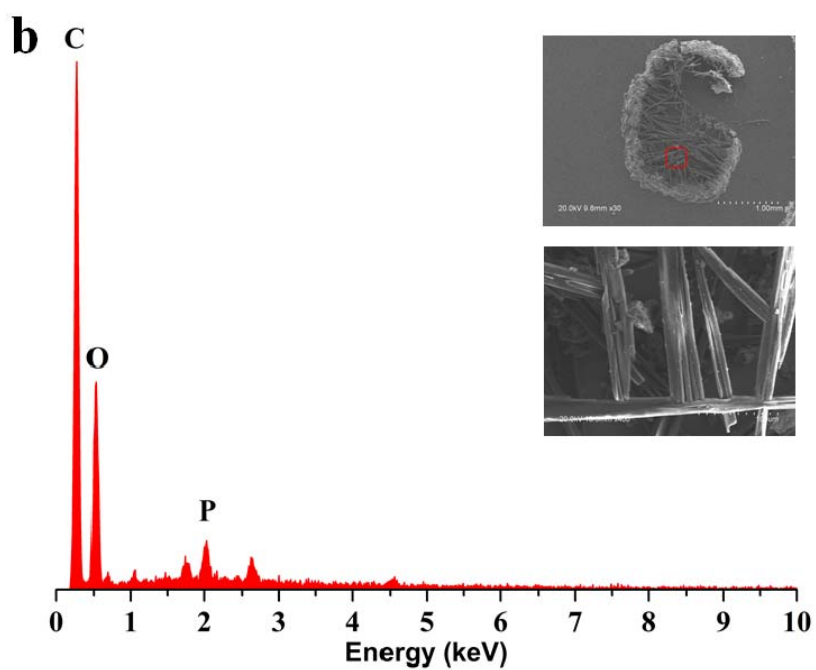

**Fig. S4.** EDX/SEM images of salt-containing sample preparation on the patterned sample support: (a) the salt contaminants are separated from the analytes. (b) the analyte-matrix co-crystallizations are distributed in the centre polymer surface.

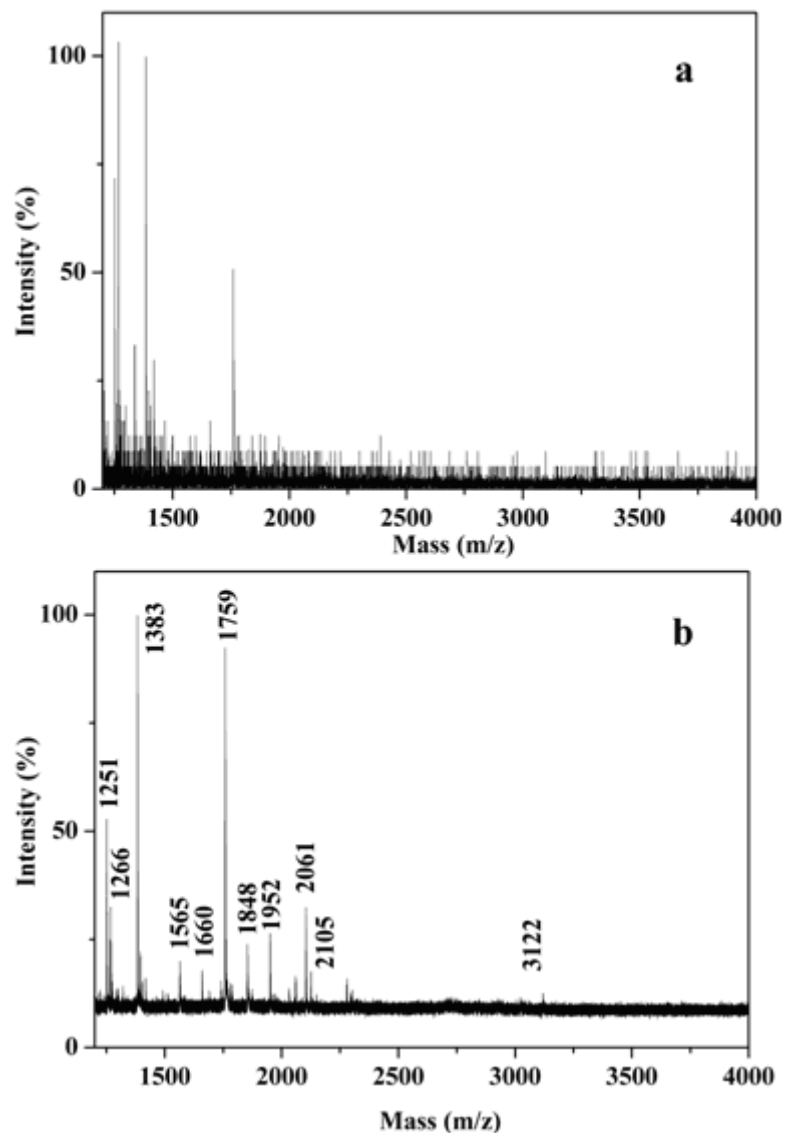

**Fig. S5.** Mass spectra of the peptides: human serum obtained with (a) the traditional MALDI plate and (b) the patterned sample support, respectively.

### References

- 1 S. K. Kailasa and H. F. Wu, *Microchim. Acta*, 2012, **179**, 83.
- 2 H. Y. Zhong, X. Xiao, S. Zheng, W. Y. Zhang, M. J. Ding, H.Y. Jiang, L. L. Huang and J. Kang, *Nat. Commun.*, 2013, **4**, 1656.
- 3 Z.G. Wang, G. Cheng, Y. L. Liu, J. L. Zhang, D. H. Sun and J. Z. Ni, *Small*, 2012, **8**, 3456.
- 4 H. Li, X. Z. Shi, L. Z. Qiao, X. Lu and G. W. Xu, *J. Chromatogr. A*, 2013, **1275**, 9.
- 5 R. Grady, M. V. Blacken, V. Tomáš, S. Martin and T. František, *Anal. Chem.*, 2007, **79**, 5449.
- 6 L. Krásný, P. Pompach, M. Strohalm, V. Obsilova, M. Strnadová, P. Nováka and M. Volnýa, *J. Mass Spectrom.*, 2012, **47**, 1294.
